# Supplementary material
Source: MDPI journal article supplement (https://www.mdpi.com/2072-4292/11/17/2000)
Supplement: s1 [file s1]

Supporting Information for

**Cotton yield estimate using Sentinel-2 data and an ecosystem model  
over the Southern US**

Submitted to ***MDPI Remote Sensing***

Liming He<sup>1\*</sup> and Georgy Mostovoy<sup>1</sup>

<sup>1</sup>Laboratory of Environmental Model and Data Optima, Laurel, MD, USA, 20707

\*Corresponding author: Liming He (liming.he@gmail.com; liming.he@emdous.com)

## 19 **S1 Summary of the BEPS model structure**

20 The Boreal Ecosystems Productivity Simulator (BEPS) - hourly version, is a process-based  
21 ecosystem model including water, energy and carbon budgets and soil thermal transfer modules  
22 (B. Z. Chen, J. M. Chen, & W. M. Ju, 2007; J. M. Chen, Liu, Cihlar, & Goulden, 1999; J. M. Chen et  
23 al., 2012; He, Chen, Liu, Bélair, & Luo, 2017; He et al., 2014). In this model, gross primary  
24 productivity (GPP) is modeled by scaling Farquhar's leaf-level biochemical model (Farquhar,  
25 Caemmerer, & Berry, 1980) up to the canopy level using a "two-leaf" approach (J. M. Chen et al.,  
26 1999; Norman, 1982). The bulk stomatal conductances of the sunlit and shaded leaves for water  
27 vapor and CO<sub>2</sub> are calculated using a modified Ball-Woodrow-Berry (BWB) stomatal model (Ball,  
28 Woodrow, & Beny, 1987). The Penman-Monteith equation (Monteith, 1965) is used to calculate  
29 the evaporation of intercepted water from the canopy and the ground surface, and canopy  
30 transpiration from sunlit and shaded leaves is computed following Y. P. Wang and Leuning  
31 (1998). The soil water dynamics is governed by the Richards equation (B. Chen, J. M. Chen, & W.  
32 Ju, 2007). The soil profile is stratified in five layers with depths of 0.05 m, 0.10 m, 0.20 m, 0.40 m,  
33 and 1.2 m from top layer to bottom layer. In BEPS, the influence of soil water on GPP is modeled  
34 through the modified BWB equation following G. B. Bonan (1995) and Weimin Ju et al. (2006).

35 Although BEPS was initially developed for boreal ecosystems, it has been expanded and used for  
36 temperate and tropical ecosystems in Asia (Matsushita & Tamura, 2002; Matsushita, Xu, Chen,  
37 Kameyama, & Tamura, 2004), China (Feng et al., 2007), Germany (Q. Wang et al., 2004), and  
38 other global applications (J. M. Chen et al., 2012; Z. Chen et al., 2017; He et al., 2018; He et al.,  
39 2017; Luo et al., 2018).

40 We summarize a few parts of BEPS that are related to the GPP modeling in detail below (He et  
41 al., 2014).

Supplementary Figure 1. (Fig. S1) A diagrammatic sketch for the BEPS model.

## Background: the BEPS model

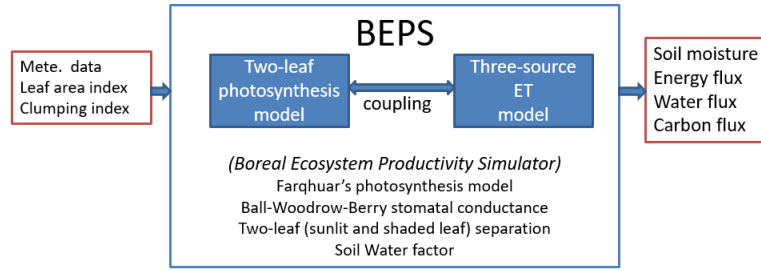

Chen J. et al. (1999), Liu J. et al. (2003), Ju W. et al. (2006), Chen B. et al. (2007),  
Chen J. M. et al. (2012), He et al. (2014)

## S2 Photosynthesis

The canopy-level photosynthesis ( $A_{canopy}$ ) is simulated as the sum of the total photosynthesis of sunlit and shaded leaf groups (J. M. Chen et al., 1999):

$$A_{canopy} = A_{sun}(g_{sc\_sun})L_{sun} + A_{sh}(g_{sc\_sh})L_{sh} \quad (1)$$

where the subscripts "sun" and "sh" denote the sunlit and shaded components of the photosynthesis ( $A$ ) and leaf area index (LAI, or  $L$ ).  $g_{sc}$  is the stomatal resistance for carbon molecules. The sunlit and shaded LAI are separated by (J. M. Chen et al., 1999; Norman, 1982):

$$\begin{aligned} L_{sun} &= 2 \cos \theta \left( 1 - e^{-0.5\Omega L / \cos \theta} \right) \\ L_{sh} &= L - L_{sun} \end{aligned} \quad (2)$$

where  $\theta$  is the solar zenith angle,  $\Omega$  is the clumping index.

The net rate of CO<sub>2</sub> assimilation (either  $A_{sun}$  or  $A_{sh}$ ) is calculated as (Farquhar et al., 1980):

$$A = \min(A_c, A_j) - R_d \quad (3)$$

$$A_c = V_{cmax} f_v(T_l) \frac{C_i - \Gamma}{C_i + K_c (1 + O_i / K_o)} \quad (4)$$

59

$$A_j = \frac{I \cdot J_{\max} f_J(T_l)}{I + 2.1 J_{\max} f_J(T_l)} \cdot \frac{C_i - \Gamma}{4C_i + 8\Gamma} \quad (5)$$

60 where  $A$ ,  $A_c$ , and  $A_j$  are the net photosynthetic, Rubisco-limited and light-limited gross  
 61 photosynthetic rates  $\mu\text{mol m}^{-2} \text{s}^{-1}$ , respectively.  $R_d$  is the daytime leaf dark respiration,  $V_{c\max}$  is  
 62 the maximum carboxylation rate at 25 °C ( $V_{c\max,\text{sun}}$  and  $V_{c\max,\text{sh}}$  for sunlit and shaded leaves,  
 63 respectively).  $J_{\max}$  is the electron transport rate at 25 °C.  $C_i$  and  $O_i$  are the intercellular  $\text{CO}_2$  and  
 64 oxygen concentration, respectively.  $\Gamma$  is the  $\text{CO}_2$  compensation point without dark respiration,  $K_c$   
 65 and  $K_o$  are the Michaelis-Menten constants for  $\text{CO}_2$  and oxygen respectively.  $I$  is the incident  
 66 photosynthetically active photon flux ( $\text{mmols m}^{-2} \text{s}^{-1}$ ).  $f_V(T_l)$  and  $f_J(T_l)$  are the leaf temperature ( $T_l$ )  
 67 response functions for  $V_{c\max}$  and  $J_{\max}$  respectively. In the model, the  $J_{\max}$  is estimated from  $V_{c\max}$   
 68 (Medlyn et al., 1999):

69

$$J_{\max} = 2.39 \cdot V_{c\max} - 14.2 \quad (6)$$

70 In the current BEPS,  $f_V(T_l)$  and  $f_J(T_l)$  share the same formula:

71

$$f(T_l) = \frac{hkin \cdot e^{\frac{eakin \cdot (T_l - T_{opt})}{rugc \cdot T_{opt} \cdot T_l}}}{hkin - eakin \cdot \left( 1 - e^{\frac{hkin \cdot (T_l - T_{opt})}{rugc \cdot T_{opt} \cdot T_l}} \right)} \quad (7)$$

72 Where,  $T_{opt}$  (301 K) is the optimum temperature for maximum carboxylation, and maximum  
 73 electron transport,  $rugc$  (universal gas constant) =  $8.314 \text{ J mole}^{-1} \text{ K}^{-1}$ ,  $hkin$  is the enthalpy term  
 74 ( $200000.0 \text{ J mol}^{-1}$ ),  $eakin$  represents the activation energy for electron transport, or  
 75 carboxylation ( $55000.0 \text{ J mol}^{-1}$ ).

### 76 **S3 N-weighted $V_{c\max}$ and $J_{\max}$ for sunlit and shaded leaves**

77 The N-weighted  $V_{c\max}$  is derived according to J. M. Chen et al. (2012):

78

$$V_{c\max,\text{sun}} = V_{c\max,0} \chi_n N_0 \frac{k [1 - e^{-(k_n+k)L}]}{(k_n + k)(1 - e^{-kL})}$$

$$V_{c\max,\text{sh}} = V_{c\max,0} \chi_n N_0 \frac{\frac{1}{k_n} (1 - e^{-k_n L}) - (1 - e^{-(k_n+k)L})}{L - 2 \cos \theta (1 - e^{-kL})} \frac{\Omega}{(k_n + k)} \quad (8)$$

where  $V_{cmax,0}$  is the leaf maximum Rubisco capacity at the top of the canopy at 25°C,  $\chi_n$  is the ratio of measured Rubisco capacity to leaf N (Dai, Dickinson, & Wang, 2004; dePury & Farquhar, 1997),  $N_0$  is the N content at the top of the canopy;  $k = G(\theta)\Omega / \cos \theta$ ,  $G(\theta)$  is the projection coefficient, usually taken as 0.5 for spherical leaf angle distribution,  $k_n$  is the leaf N content decay rate with increasing depth into the canopy, taken as equal to 0.3 after dePury and Farquhar (1997).

#### S4 Surface evaporation and Canopy level transpiration

The latent heat (LE) is simulated as:

$$LE = \lambda (T + E_l + E_g) \quad (9)$$

where  $\lambda$  is the latent heat of vaporization.  $T$  is the transpiration rate from canopy ( $\text{kg m}^{-2} \text{s}^{-1}$ ),  $E_l$  and  $E_g$  are evaporation rates of intercepted water from canopy and ground surface ( $\text{kg m}^{-2} \text{s}^{-1}$ ), respectively.

The canopy level transpiration is obtained by:

$$T = T_{sun}(g_{s\_sun})L_{sun} + T_{sh}(g_{s\_sh})L_{sh} \quad (10)$$

where  $T_{sun}$  and  $T_{sh}$  are the average transpiration rates for sunlit and shaded leaves, respectively. The nonlinear relationship between  $T_{sun}$  ( $T_{sh}$ ) and  $L_{sun}$  ( $L_{sh}$ ) is considered in the parameters used to calculate  $T$ .  $g_s$  is stomatal resistance for water molecules.  $g_s/g_{sc} = 1.6$ . Following Y. P. Wang and Leuning (1998), transpiration from sunlit leave is calculated as (W. Ju, Wang, Yu, Zhou, & Wang, 2010):

$$T_{sun} = \frac{D_a + \Delta(T_{s,sun} - T_a)}{r_{sun}} \frac{\rho C_p}{\gamma} \quad (11)$$

where  $D_a$  is the atmospheric vapor pressure deficit (kPa).  $\Delta$  is the rate of change of the saturated vapor pressure with temperature ( $\text{kPa } ^\circ\text{C}^{-1}$ ).  $T_{s,sun}$  and  $T_a$  are temperatures at sunlit leaf surface and air temperature ( $^\circ\text{C}$ ), respectively.  $\rho$  is the air density ( $\text{kg m}^{-3}$ ).  $C_p$  is the specific heat of air at constant temperature ( $1010 \text{ J kg}^{-1} \text{ } ^\circ\text{C}^{-1}$ ), and

$$r_{sun} = r_b + r_a + 1 / g_{s\_sun} \quad (12)$$

105 where  $r_a$  and  $r_b$  are aerodynamic and boundary layer resistance ( $s\ m^{-1}$ ), respectively, and  $\gamma$  is  
 106 the psychrometric constant ( $kPa\ ^\circ C^{-1}$ ). To calculate  $T_{sh}$ ,  $T_{s,sh}$  (temperature at shaded leaf surface)  
 107 and  $g_{s,sh}$  are used to replace  $T_{s,sun}$  and  $g_{s,sun}$  in eq. (11) and (12).

108 The evaporation from soil  $E_g$  is estimated using the Penman–Monteith equation (Monteith,  
 109 1965):

$$110 \quad \lambda E_g = \frac{\Delta(R_g - 0) + \rho C_p VPD_g / r_{a,g}}{\Delta + \gamma(1 + r_{soil} / r_{a,g})} \quad (13)$$

111 where  $R_g$  is the net radiation in the ground,  $VPD_g$  is Vapor pressure deficit at the ground level,  
 112  $r_{a,g}$  is the aerodynamic resistance of ground surface,  $r_{soil}$  is the soil resistance for evaporation. In  
 113 Sellers et al. (1996),

$$114 \quad r_{soil} = \exp(8.2 - 4.2 \cdot \theta_1 / \theta_s) \quad (14)$$

115 where  $\theta_1$  is volumetric soil VWC in first layer ( $m^3\ m^{-3}$ ), and  $\theta_s$  is value of  $\theta$  at saturation ( $m^3\ m^{-3}$ ).  
 116 The  $r_{soil}$  from Sellers et al. (1996) is a rough estimate that is derived from bare soil surface  
 117 (Sellers, Heiser, & Hall, 1992). The evaporation can be overestimated if this equation is used  
 118 since it does not consider the organic layer in the soil horizons. In BEPS, we used  $4 \cdot r_{soil}$  in the  
 119 BEPS model.

120 The evaporation from intercepted water from sunlit and shaded leave  $E_l$  are estimated similarly  
 121 using eq. (13) to (14), but without the term for stomatal resistance (i.e.,  $r_s=0$ ).

## 122 **S5 Simulation of stomatal closure with rising CO<sub>2</sub> concentration in BEPS.**

123 Leaf stomata control the exchanges of water vapor and CO<sub>2</sub> between plants and the  
 124 atmosphere. Under high atmospheric CO<sub>2</sub> concentration, stomatal density and hence  
 125 conductance may decrease (Franks & Beerling, 2009). BEPS inherits the Ball-Woodrow-Berry  
 126 (BWB) equation to model stomatal conductance ( $g_s$ ,  $\mu mol\ m^{-2}\ s^{-1}$ ) (Ball et al., 1987):

$$127 \quad g_s = g_0 + m \cdot h_s \cdot p \cdot \frac{A}{C_s} \quad (15)$$

128 where  $g_0$  is a small value, the stomatal conductance at the light compensation point,  $m$  is a plant  
 129 species dependent coefficient,  $h_s$  is the relative humidity at the leaf surface,  $p$  is the atmospheric  
 130 pressure,  $A$  is the photosynthesis rate, and  $C_s$  is the molar fraction of CO<sub>2</sub> at the leaf surface.

The important influences of soil water on  $g$  and  $A$  are not mechanistically included in the original BWB formulation. Following G. B. Bonan (1995) and Weimin Ju et al. (2006), we modify it as follows:

$$g_s = g_0 + f_w \cdot m \cdot h_s \cdot p \cdot \frac{A}{C_s} \quad (16)$$

where  $f_w$  is a soil water stress factor, which we assume to be a function of soil water content.

In Weimin Ju et al. (2006), the  $f_w$  is modeled as:

$$f_w = \sum_{i=1}^n f_{w,i} w_i \quad (17)$$

where  $f_{w,i}$  is the soil water availability factor in layer  $i$ , and calculated as:

$$f_{w,i} = \frac{1.0}{f_i(\psi_i) f_i(T_{s,i})} \quad (18)$$

where  $f_i(\psi_i)$  is a function of matrix suction  $\psi_i$  (m) (Zierl, 2001):

$$f_i(\psi_i) = \begin{cases} 1.0 + \left[ \frac{\psi_i - 10.0}{10.0} \right]^\alpha & \psi_i > 10 \\ 1.0 & \text{else} \end{cases} \quad (19)$$

where  $\alpha$  is suggested to be a function of plant type (J. M. Chen et al., 2012).

The effect of soil temperature on soil water uptake is described as follows (Gordon B. Bonan, 1991):

$$f_i(T_{s,i}) = \begin{cases} \frac{1.0}{1 - \exp(t_1 T_{s,i}^{t_2})} & T_{s,i} > 0 \\ \infty & \text{else} \end{cases} \quad (20)$$

where  $t_1$  and  $t_2$  are two parameters determining the sensitivity of water uptake by roots to soil temperature. In the BEPS,  $t_1 = -0.02$  and  $t_2 = 2.0$ .

To consider the variable soil water potential at different depths,  $w_i$  is calculated as:

$$w_i = \frac{R_i f_{w,i}}{\sum_{i=1}^n R_i f_{w,i}} \quad (21)$$

where  $R_i$  is the root fraction in layer  $i$ .

Apparently,  $g_s$  will increase with  $A$  (due to increase in photosynthetically active radiation (PAR) and / or  $V_{\text{cmax}}$ ) assuming there is no change in  $f_w$ ,  $m$ ,  $h_s$ ,  $p$ , and  $C_s$ .

The BWB equation can simulate the stomatal closure due to  $\text{CO}_2$  fertilization. Assuming that there is no change in  $f_w$ ,  $m$ ,  $h_s$ ,  $p$ ,  $V_{\text{cmax}}$  and PAR, there is an associated increase in intercellular  $\text{CO}_2$  concentration ( $C_i$ ) for an increase in  $C_s$ . Since  $A$  is often limited either by Rubisco or by Electron-transport rate, the increase in  $A$  will be not proportional to  $C_s$ ; or in other words, the ratio of  $A$  to  $C_s$  will remain the same or decrease with rising  $C_s$ . As a result, the  $g_s$  in the left side of BWB equation will remain the same or decrease (leading to stomatal closure) with rising  $C_s$  (Baldocchi, 1994).

The BWB equation is used in many climate models, such as those in Coupled Model Intercomparison Project Phase 5 (CMIP5, [http://www.nature.com/ngeo/journal/v6/n6/fig\\_tab/ngeo1801\\_T1.html](http://www.nature.com/ngeo/journal/v6/n6/fig_tab/ngeo1801_T1.html)) and TRENDY (Sitch et al., 2008) to study the global transpiration decrease (or increase of water use efficiency) due to  $\text{CO}_2$  fertilization (Frank et al., 2015; Swann, Hoffman, Koven, & Randerson, 2016).

## **S6 Calculations of radiation at Sunlit- and Shaded- leaf groups**

We refer to "Appendix A. Algorithms for net radiation of vegetation and ground surface" by B. Chen et al. (2016) for radiation calculation.

## **S7 Calculations of Sunlit- and Shaded- leaf temperatures**

For a sunlit or shaded leaf, its temperature ( $T_l$ ) is calculated as below during an iteration.

$$T_l = T_a + \frac{R_n - VPD_a \cdot \rho_a \cdot Cp_{ca} \cdot p^*}{\rho_a \cdot Cp_{ca} \cdot (G_h + \Delta \cdot p^*)} \quad (22)$$

where,  $T_a$  is the air temperature in  $^{\circ}\text{C}$ ,  $R_n$  is the net radiation of sunlit- or shaded- leaf calculated from S1.6,  $VPD_a$  is water vapor deficit at the reference height,  $\rho_a$  is the density of air at  $0^{\circ}\text{C}$ ,  $Cp_{ca}$  is specific heat of moist air above the canopy,  $G_h$  is the total conductance for heat transfer



175 from the leaf surface to the reference height above the canopy,  $\Delta$  is the rate of change (slope)  
176 of the saturated vapor pressure with temperature (kPa °C<sup>-1</sup>),

177 
$$p^* = \frac{G_w + G_{ww} \cdot (X_{cs} + X_{cl})}{psychrometer} \quad (23)$$

178 where,  $G_w$  is the total conductance for water from the intercellular space of the leaves to the  
179 reference height above the canopy,  $G_{ww}$  is the total conductance for water from the surface of  
180 the leaves to the reference height above the canopy, Psychrometer is the psychrometric  
181 constant (0.066),  $X_{cl}$  and  $X_{cs}$  are the fractions of canopy covered by liquid water and snow.

182

183

## 184 **S8 Forcing data and model parameters.**

185 Climate reanalysis data are the outputs of an Earth system model that assimilates various  
186 archived observations. Global reanalysis data are the best available datasets for this study.  
187 MERRA-2 (Modern-Era Retrospective Analysis for research and Applications, Version 2) data  
188 from GSFC, NASA are used to drive BEPS to simulate GPP and ET in 2017 (Rienecker et al., 2011).  
189 The data have a spatial resolution of  $0.625^\circ$  (longitude) by  $0.5^\circ$  (latitude) and a temporal  
190 resolution of one hour. To drive BEPS, relative humidity, wind speed, and air temperature at 2 m  
191 above the surface, surface atmosphere pressure and incoming solar shortwave flux, and total  
192 precipitation at the surface level are spatially interpolated to the 20 m grid. The precipitation  
193 data from MERRA are corrected by global gauge-based NOAA Climate Prediction Center  
194 "Unified" (CPCU) precipitation product (CPCU). Recent validation suggests that MERRA2 datasets  
195 have relative small errors comparing to a few other reanalysis datasets (Draper, Reichle, &  
196 Koster, 2018; Eyre & Zeng, 2017; Reichle, Draper, et al., 2017; Reichle, Liu, et al., 2017; Simmons  
197 et al., 2017).

198 To simulate the CO<sub>2</sub> fertilization effect, the CO<sub>2</sub> concentration data are from  
199 <https://www.esrl.noaa.gov/gmd/ccgg/trends/global.html>.

200

## 201 **S9 Previous validations of BEPS**

202 Recent validations of GPP against eddy covariance measurements suggest that BEPS can explain  
203 more than 80% of the daily GPP variance at flux tower sites (Gonsamo et al., 2013; Sprintsin,  
204 Chen, Desai, & Gough, 2012). When soil water stress is properly addressed, BEPS explains 56-  
205 90% of the hourly GPP variance for maximum LAI values ranging from 2.1 to 8 (B. Chen et al.,  
206 2016). In 2018, the BEPS-simulated GPP is validated against eddy covariance measurements  
207 from 124 flux tower sites (FLUXNET2015 Dataset in Tier 1; <http://fluxnet.fluxdata.org/>) at the site  
208 level; validation suggests that BEPS simulates annual GPP well with a coefficient of  
209 determinations ( $R^2$ ) of 0.81, a RMSE of  $347 \text{ g C m}^{-2} \text{ yr}^{-1}$ , and a bias of  $172 \text{ g C m}^{-2} \text{ yr}^{-1}$  (He et al.,  
210 2018).

211

212  
213  
214

215 Baldocchi, D. (1994). An Analytical Solution for Coupled Leaf Photosynthesis and Stomatal Conductance  
216 Models. *Tree Physiology*, 14(7-9), 1069-1079.

217 Ball, J., Woodrow, L. E., & Beny, J. A. (1987). A model predicting stomatal conductance and its  
218 contribution to the control of photosynthesis under different environmental conditions. In J.  
219 Biggins (Ed.), *Progress in Photosynthesis research* (Vol. 4, pp. 221-224): Nijhoff, Dordrecht.

220 Bonan, G. B. (1991). A biophysical surface energy budget analysis of soil temperature in the boreal  
221 forests of interior Alaska. *Water Resources Research*, 27(5), 767-781. doi:10.1029/91WR00143

222 Bonan, G. B. (1995). Land Atmosphere Co2 Exchange Simulated by a Land-Surface Process Model  
223 Coupled to an Atmospheric General-Circulation Model. *Journal of Geophysical Research-*  
224 *Atmospheres*, 100(D2), 2817-2831. doi:Doi 10.1029/94jd02961

225 Chen, B., Chen, J. M., & Ju, W. (2007). Remote sensing-based ecosystem-atmosphere simulation scheme  
226 (EASS)—Model formulation and test with multiple-year data. *Ecological Modelling*, 209(2-4),  
227 277-300. doi:<http://dx.doi.org/10.1016/j.ecolmodel.2007.06.032>

228 Chen, B., Liu, J., Chen, J. M., Croft, H., Gonsamo, A., He, L., & Luo, X. (2016). Assessment of foliage  
229 clumping effects on evapotranspiration estimates in forested ecosystems. *Agricultural and*  
230 *Forest Meteorology*, 216, 82-92. doi:<http://dx.doi.org/10.1016/j.agrformet.2015.09.017>

231 Chen, B. Z., Chen, J. M., & Ju, W. M. (2007). Remote sensing-based ecosystem-atmosphere simulation  
232 scheme (EASS) - Model formulation and test with multiple-year data. *Ecological Modelling*,  
233 209(2-4), 277-300. doi:DOI 10.1016/j.ecolmodel.2007.06.032

234 Chen, J. M., Liu, J., Cihlar, J., & Goulden, M. L. (1999). Daily canopy photosynthesis model through  
235 temporal and spatial scaling for remote sensing applications. *Ecological Modelling*, 124(2-3), 99-  
236 119. doi:Doi 10.1016/S0304-3800(99)00156-8

237 Chen, J. M., Mo, G., Pisek, J., Liu, J., Deng, F., Ishizawa, M., & Chan, D. (2012). Effects of foliage clumping  
238 on the estimation of global terrestrial gross primary productivity. *Global Biogeochemical Cycles*,  
239 26. doi:Artn Gb1019. Doi 10.1029/2010gb003996

240 Chen, Z., Chen, J. M., Zhang, S., Zheng, X., Ju, W., Mo, G., & Lu, X. (2017). Optimization of terrestrial  
241 ecosystem model parameters using atmospheric CO2 concentration data with the Global Carbon  
242 Assimilation System (GCAS). *Journal of Geophysical Research: Biogeosciences*, n/a-n/a.  
243 doi:10.1002/2016JG003716

244 Dai, Y. J., Dickinson, R. E., & Wang, Y. P. (2004). A two-big-leaf model for canopy temperature,  
245 photosynthesis, and stomatal conductance. *Journal of Climate*, 17(12), 2281-2299. doi:Doi  
246 10.1175/1520-0442(2004)017<2281:Atmfct>2.0.Co;2

247 dePury, D. G. G., & Farquhar, G. D. (1997). Simple scaling of photosynthesis from leaves to canopies  
248 without the errors of big-leaf models. *Plant Cell and Environment*, 20(5), 537-557. doi:DOI  
249 10.1111/j.1365-3040.1997.00094.x

250 Draper, C. S., Reichle, R. H., & Koster, R. D. (2018). Assessment of MERRA-2 Land Surface Energy Flux  
251 Estimates. *Journal of Climate*, 31(2), 671-691.

252 Eyre, J. E. J. R., & Zeng, X. B. (2017). Evaluation of Greenland near surface air temperature datasets.  
253 *Cryosphere*, 11(4), 1591-1605.

254 Farquhar, G. D., Caemmerer, S. V., & Berry, J. A. (1980). A Biochemical-Model of Photosynthetic Co2  
255 Assimilation in Leaves of C-3 Species. *Planta*, 149(1), 78-90. doi:Doi 10.1007/Bf00386231

- Feng, X., Liu, G., Chen, J. M., Chen, M., Liu, J., Ju, W. M., . . . Zhou, W. (2007). Net primary productivity of China's terrestrial ecosystems from a process model driven by remote sensing. *Journal of Environmental Management*, 85(3), 563-573.
- Frank, D. C., Poulter, B., Saurer, M., Esper, J., Huntingford, C., Helle, G., . . . Weigl, M. (2015). Water-use efficiency and transpiration across European forests during the Anthropocene. *Nature Climate Change*, 5(6), 579-+.
- Franks, P. J., & Beerling, D. J. (2009). Maximum leaf conductance driven by CO<sub>2</sub> effects on stomatal size and density over geologic time. *Proceedings of the National Academy of Sciences of the United States of America*, 106(25), 10343-10347. doi:10.1073/pnas.0904209106
- Gonsamo, A., Chen, J. M., Price, D. T., Kurz, W. A., Liu, J., Boisvenue, C., . . . Chang, K. H. (2013). Improved assessment of gross and net primary productivity of Canada's landmass. *Journal of Geophysical Research-Biogeosciences*, 118(4), 1546-1560. doi:10.1002/2013jg002388
- He, L., Chen, J. M., Gonsamo, A., Luo, X. Z., Wang, R., Liu, Y., & Liu, R. G. (2018). Changes in the Shadow: The Shifting Role of Shaded Leaves in Global Carbon and Water Cycles Under Climate Change. *Geophysical Research Letters*, 45(10), 5052-5061.
- He, L., Chen, J. M., Liu, J., Bélair, S., & Luo, X. (2017). Assessment of SMAP soil moisture for global simulation of gross primary production. *Journal of Geophysical Research: Biogeosciences*, 122, doi:10.1002/2016JG003603. doi:10.1002/2016JG003603
- He, L., Chen, J. M., Liu, J., Mo, G., Bélair, S., Zheng, T., . . . Barr, A. G. (2014). Optimization of water uptake and photosynthetic parameters in an ecosystem model using tower flux data. *Ecological Modelling*, 294(0), 94-104. doi:<http://dx.doi.org/10.1016/j.ecolmodel.2014.09.019>
- Ju, W., Chen, J. M., Black, T. A., Barr, A. G., Liu, J., & Chen, B. (2006). Modelling multi-year coupled carbon and water fluxes in a boreal aspen forest. *Agricultural and Forest Meteorology*, 140(1-4), 136-151. doi:10.1016/j.agrformet.2006.08.008
- Ju, W., Wang, S., Yu, G., Zhou, Y., & Wang, H. (2010). Modeling the impact of drought on canopy carbon and water fluxes for a subtropical evergreen coniferous plantation in southern China through parameter optimization using an ensemble Kalman filter. *Biogeosciences*, 7(3), 845-857.
- Luo, X. Z., Chen, J. M., Liu, J. E., Black, T. A., Croft, H., Staebler, R., . . . McCaughey, H. (2018). Comparison of Big-Leaf, Two-Big-Leaf, and Two-Leaf Upscaling Schemes for Evapotranspiration Estimation Using Coupled Carbon-Water Modeling. *Journal of Geophysical Research-Biogeosciences*, 123(1), 207-225. doi:10.1002/2017jg003978
- Matsushita, B., & Tamura, M. (2002). Integrating remotely sensed data with an ecosystem model to estimate net primary productivity in East Asia. *Remote Sensing of Environment*, 81(1), 58-66.
- Matsushita, B., Xu, M., Chen, J., Kameyama, S., & Tamura, M. (2004). Estimation of regional net primary productivity (NPP) using a process-based ecosystem model: How important is the accuracy of climate data? *Ecological Modelling*, 178(3-4), 371-388.
- Medlyn, B. E., Badeck, F. W., De Pury, D. G. G., Barton, C. V. M., Broadmeadow, M., Ceulemans, R., . . . Jarvis, P. G. (1999). Effects of elevated [CO<sub>2</sub>] on photosynthesis in European forest species: a meta-analysis of model parameters. *Plant Cell and Environment*, 22(12), 1475-1495. doi:DOI 10.1046/j.1365-3040.1999.00523.x
- Monteith, J. L. (1965). Evaporation and environment. *Symposia of the Society for Experimental Biology*, 19, 205-224.
- Norman, J. M. (1982). SIMULATION OF MICROCLIMATES. In H. Jerry (Ed.), *Biometeorology in Integrated Pest Management* (pp. 65-99): Academic Press.
- Reichle, R. H., Draper, C. S., Liu, Q., Girotto, M., Mahanama, S. P. P., Koster, R. D., & De Lannoy, G. J. M. (2017). Assessment of MERRA-2 Land Surface Hydrology Estimates. *Journal of Climate*, 30(8), 2937-2960.

- Reichle, R. H., Liu, Q., Koster, R. D., Draper, C. S., Mahanama, S. P. P., & Partyka, G. S. (2017). Land Surface Precipitation in MERRA-2. *Journal of Climate*, 30(5), 1643-1664.
- Rienecker, M. M., Suarez, M. J., Gelaro, R., Todling, R., Bacmeister, J., Liu, E., . . . Woollen, J. (2011). MERRA: NASA's Modern-Era Retrospective Analysis for Research and Applications. *Journal of Climate*, 24(14), 3624-3648.
- Sellers, P. J., Heiser, M. D., & Hall, F. G. (1992). Relations between Surface Conductance and Spectral Vegetation Indexes at Intermediate (100m<sup>2</sup> to 15km<sup>2</sup>) Length Scales. *Journal of Geophysical Research-Atmospheres*, 97(D17), 19033-19059.
- Sellers, P. J., Randall, D. A., Collatz, G. J., Berry, J. A., Field, C. B., Dazlich, D. A., . . . Bounoua, L. (1996). A revised land surface parameterization (SiB2) for atmospheric GCMs .1. Model formulation. *Journal of Climate*, 9(4), 676-705. doi:Doi 10.1175/1520-0442(1996)009<0676:ArIspf>2.0.Co;2
- Simmons, A. J., Berrisford, P., Dee, D. P., Hersbach, H., Hirahara, S., & Thepaut, J. N. (2017). A reassessment of temperature variations and trends from global reanalyses and monthly surface climatological datasets. *Quarterly Journal of the Royal Meteorological Society*, 143(702), 101-119.
- Sitch, S., Huntingford, C., Gedney, N., Levy, P. E., Lomas, M., Piao, S. L., . . . Woodward, F. I. (2008). Evaluation of the terrestrial carbon cycle, future plant geography and climate-carbon cycle feedbacks using five Dynamic Global Vegetation Models (DGVMs). *Global Change Biology*, 14(9), 2015-2039.
- Sprintsin, M., Chen, J. M., Desai, A., & Gough, C. M. (2012). Evaluation of leaf-to-canopy upscaling methodologies against carbon flux data in North America. *Journal of Geophysical Research-Biogeosciences*, 117. doi:Artn G01023
- 10.1029/2010jg001407
- Swann, A. L. S., Hoffman, F. M., Koven, C. D., & Randerson, J. T. (2016). Plant responses to increasing CO<sub>2</sub> reduce estimates of climate impacts on drought severity. *Proceedings of the National Academy of Sciences of the United States of America*, 113(36), 10019-10024.
- Wang, Q., Tenhunen, J., Falge, E., Bernhofer, C., Granier, A., & Vesala, T. (2004). Simulation and scaling of temporal variation in gross primary production for coniferous and deciduous temperate forests. *Global Change Biology*, 10(1), 37-51.
- Wang, Y. P., & Leuning, R. (1998). A two-leaf model for canopy conductance, photosynthesis and partitioning of available energy I: Model description and comparison with a multi-layered model. *Agricultural and Forest Meteorology*, 91(1-2), 89-111. doi:Doi 10.1016/S0168-1923(98)00061-6
- Zierl, B. (2001). A water balance model to simulate drought in forested ecosystems and its application to the entire forested area in Switzerland. *Journal of Hydrology*, 242(1-2), 115-136.
